# Supplementary material for: Mussel-Inspired Calcium Alginate/Polyacrylamide Dual Network Hydrogel: A Physical Barrier to Prevent Postoperative Re-Adhesion
Source: MDPI journal article supplement (doi:10.3390/polym15234498), 2023-11-23
Supplement: s1 [file s1]

# **Mussel-inspired calcium alginate/polyacrylamide dual network hydrogel: a physical barrier to prevent postoperative re-adhesion**

Zekun Su<sup>1</sup>, Beibei Xue<sup>1</sup>, Chang Xu<sup>2</sup>, Yue Kang<sup>3</sup>, Xufeng Dong<sup>1\*</sup>

<sup>1</sup> School of Materials Science and Engineering, Dalian University of Technology, Dalian 116024, China.

<sup>2</sup> Institute of Cardio-Cerebrovascular Medicine, Central Hospital of Dalian University of Technology, Dalian 116089, China.

<sup>3</sup> Department of Breast Surgery, Liaoning Cancer Hospital & Institute, Shenyang 110042, China.

\* Corresponding author.

E-mail addresses: dongxf@dlut.edu.cn (X. Dong)

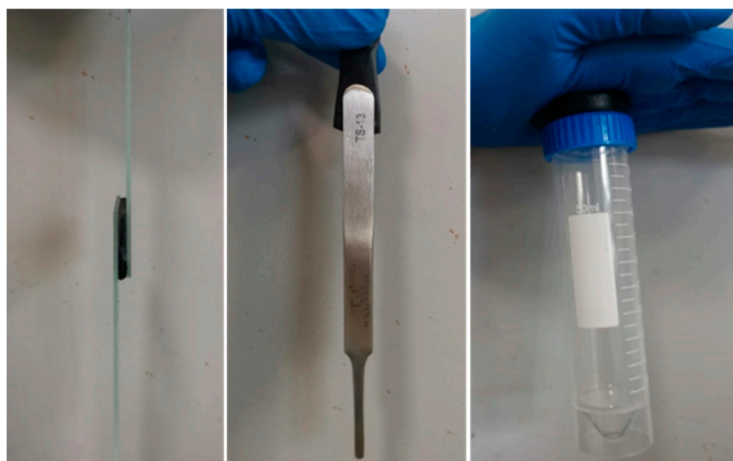

Figure S1. Adhesion of 10 PDA-CA-PAM hydrogel to other materials.

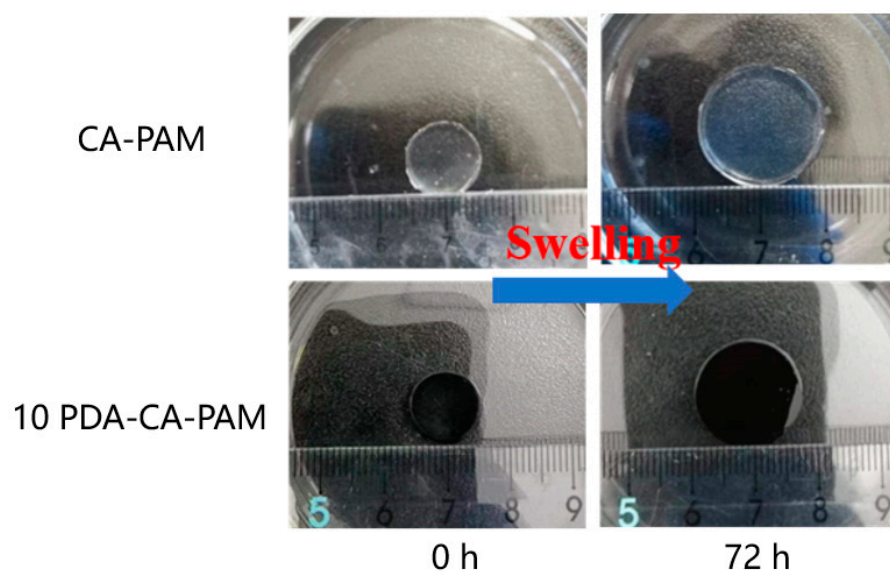

Figure S2. Comparison between CA-PAM and PDA-CA-PAM hydrogel before and after swelling.
